# Supplementary material
Source: PubMed Central journal article supplement (PMC3999313)

**Tables and Figures**

Table 1. Additive main effects of childhood adversity and *ADH1B* on alcohol-related phenotypes in 1,143 ever-drinkers

Table 2. Additive interaction effects of childhood adversity and *ADH1B* on Maxdrinks and AUD severity in 1,143 ever-drinkers

Figure 1. Additive interaction between childhood adversity and *ADH1B-rs1229984* on (a) Maxdrinks and (b) AUD severity in 1,143 ever-drinkers

Supplementary Figure 1. Distribution of Maxdrinks and AUD severity in 1,143 ever drinkers

Supplemental Table 1. *ADH1B-rs1229984*

**Supplemental Table 1.** *ADH1B*-rs1229984

| Chromosomal<br>Location <sup>a</sup> | N <sup>b</sup> | HWE      |             | Allele | Prevalence (%) |                       | Genotype | Prevalence (%) |                       | Risk status<br>(prevalence [%] in<br>drinkers) |
|--------------------------------------|----------------|----------|-------------|--------|----------------|-----------------------|----------|----------------|-----------------------|------------------------------------------------|
|                                      |                | $\chi^2$ | p-<br>value |        | Whole<br>set   | Drinkers<br>(N=1,143) |          | Whole<br>set   | Drinkers<br>(N=1,143) |                                                |
| 100239319                            | 1,201          | 2.04     | 0.141       | A      | 28.3           | 28.2                  | AA       | 8.8            | 9.0                   | Low risk [47.5%]<br><br>High risk [52.5%]      |
|                                      |                |          |             | G      | 71.7           | 71.8                  | AG       | 38.9           | 38.5                  |                                                |
|                                      |                |          |             |        |                |                       | GG       | 52.3           | 52.5                  |                                                |

HWE = Hardy-Weinberg Equilibrium

<sup>a</sup>chromosome 4, based upon GRCh37.p5.

<sup>b</sup> N = number successfully genotyped.

**Supplementary Figure 1.** Distribution of Maxdrinks (a) and AUD severity (b) in 1,143 ever drinkers

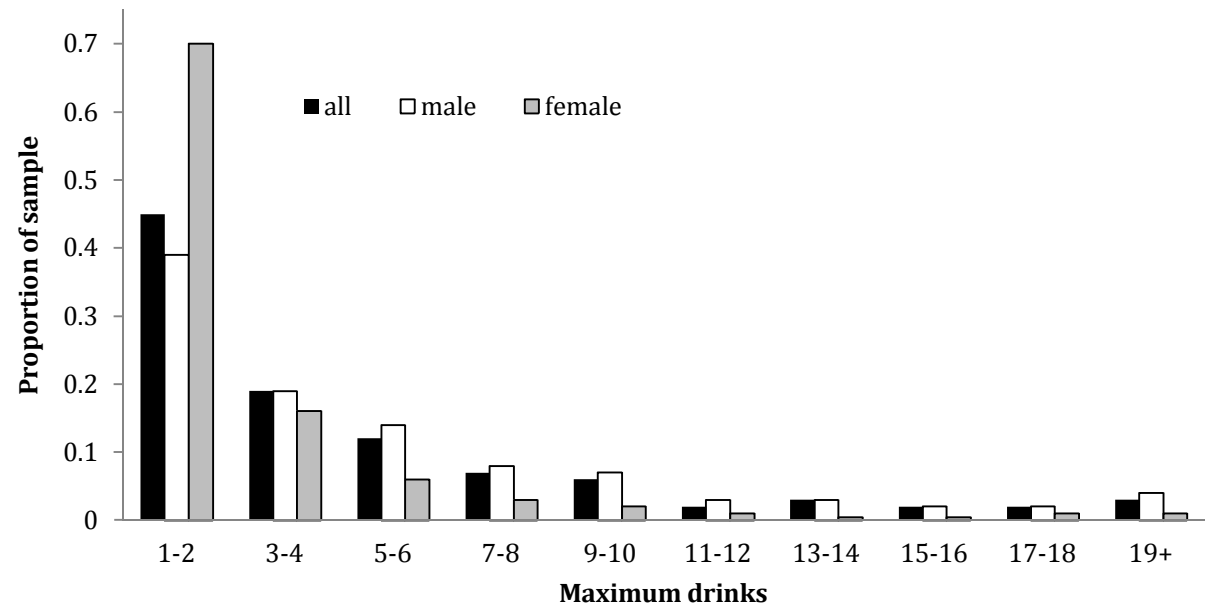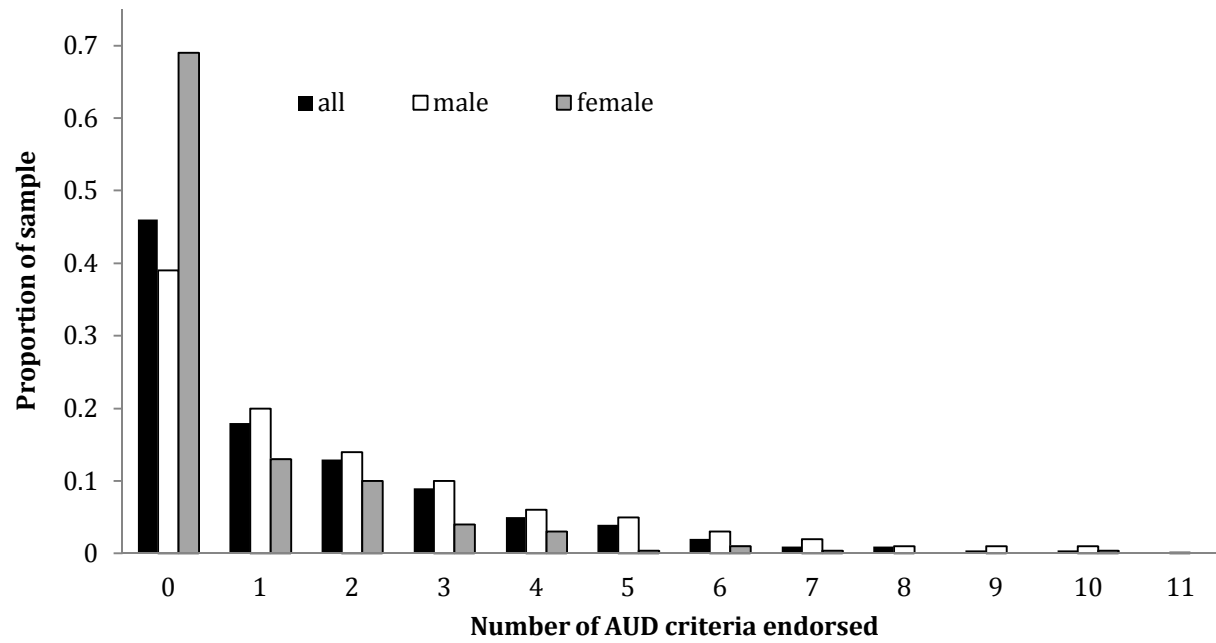

Supplement: NIHMS533243-supplement-supplement_1.pdf [file NIHMS533243-supplement-supplement_1.pdf]
